# Supplementary material for: Experimental evidence for a role of dopamine on avian personality traits
Source: Oxford University Press journal article supplement (doi:10.1242/jeb.216499), 2020-01-01
Supplement: jeb216499supp.pdf [file jeb216499supp.pdf]

## Supplementary Figures

to Silva et al., “Evidence for a role of dopamine on avian personality”

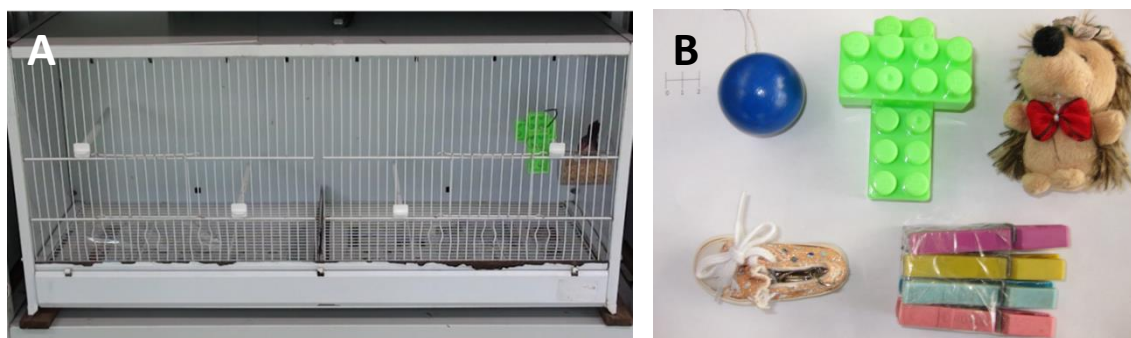

**Fig. S1.** A) Cage for the activity, feeding and novel object test, showing a feeder and a novel object near the rightmost perch. B) Novel objects used in the activity, feeding and novel object test.

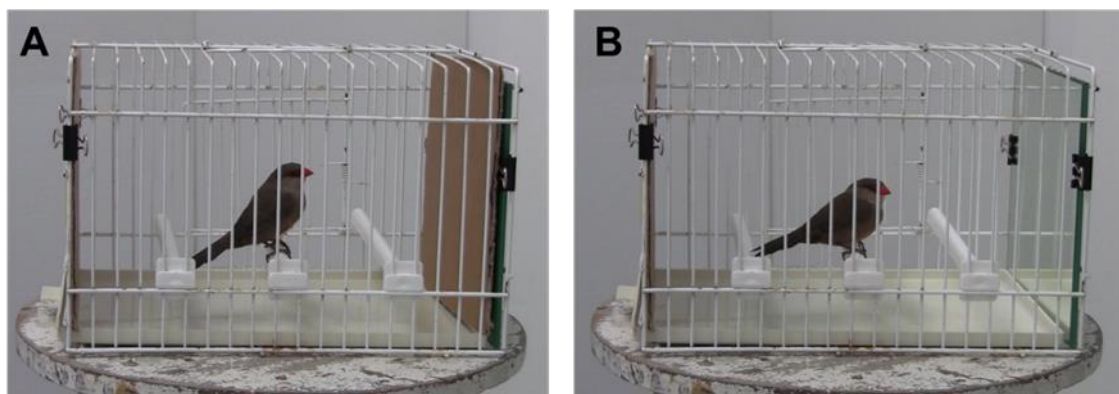

**Fig. S2.** Cage for the mirror test, shown A) with the mirror covered and B) with the mirror exposed.

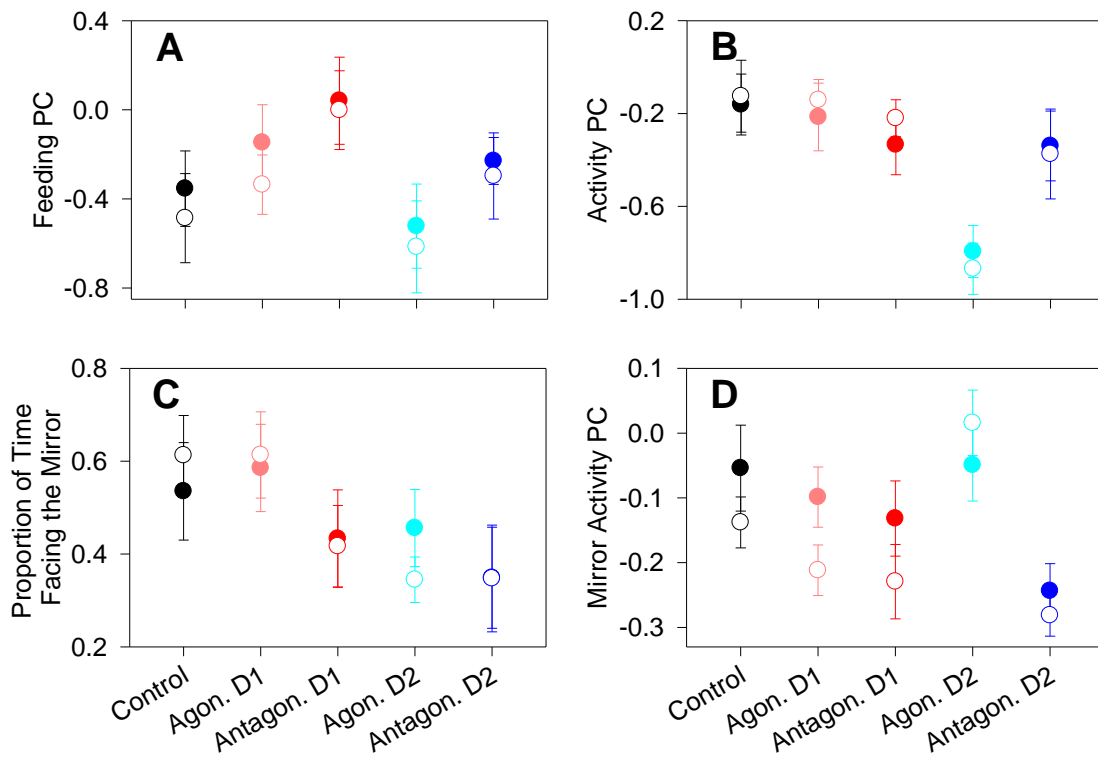

**Fig. S3.** Means and standard error for each experimental treatment of A) the feeding PC, B) the activity PC, C) the proportion of time looking at the mirror, and D) the mirror activity PC, separated by sex (males: closed dots; females: open dots).

**Table S1.** Trait loadings of principal components (PC1, PC2 and PC3) for the Principal Component Analysis (PCA) of three behaviours in the mirror test. Loadings  $> |0.5|$  are marked in bold, and proportion of variance explained by each principal component is indicated.

|                                   | PC1          | PC2           | PC3           |
|-----------------------------------|--------------|---------------|---------------|
| Trait loadings                    |              |               |               |
| Changing location                 | <b>0.673</b> | -0.311        | <b>0.670</b>  |
| Fast movement                     | <b>0.665</b> | -0.370        | <b>-0.648</b> |
| Resting                           | <b>0.544</b> | <b>-0.838</b> | 0.037         |
| Proportion of Variance            | 0.398        | 0.312         | 0.290         |
| Cumulative Proportion of Variance | 0.398        | 0.710         | 1.000         |
